# Supplementary material for: Predictive value of glucose transporter-1 and glucose transporter-3 for survival of cancer patients: A meta-analysis
Source: PubMed Central journal article supplement (PMC5355089; doi:10.18632/oncotarget.14570), 2017-01-10
Supplement: oncotarget-08-13206-s001.pdf [file oncotarget-08-13206-s001.pdf]

# Predictive value of glucose transporter-1 and glucose transporter-3 for survival of cancer patients: A meta-analysis

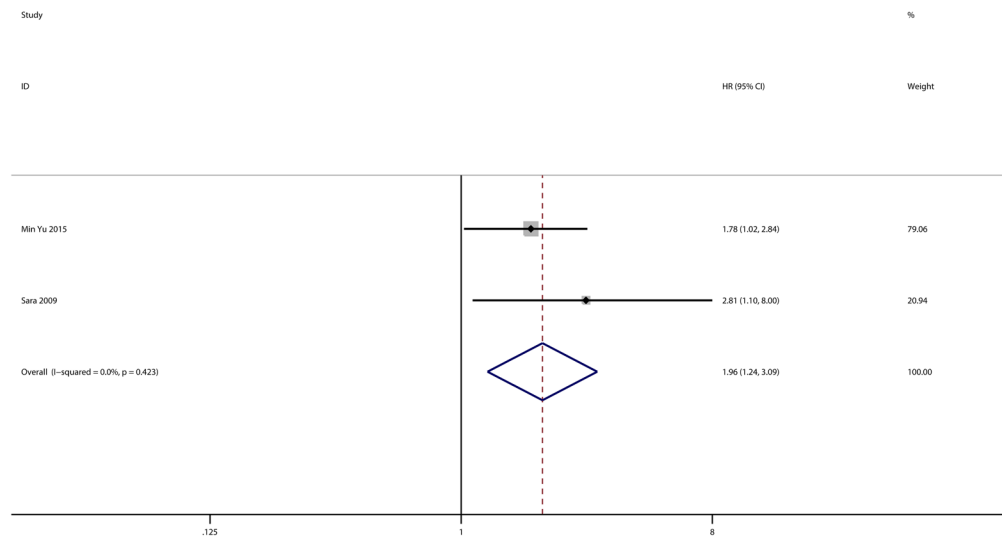

Supplementary Figure 1: Meta-analysis with a random-effect model for the association between GLUT-1 and OS in pancreatic cancer.

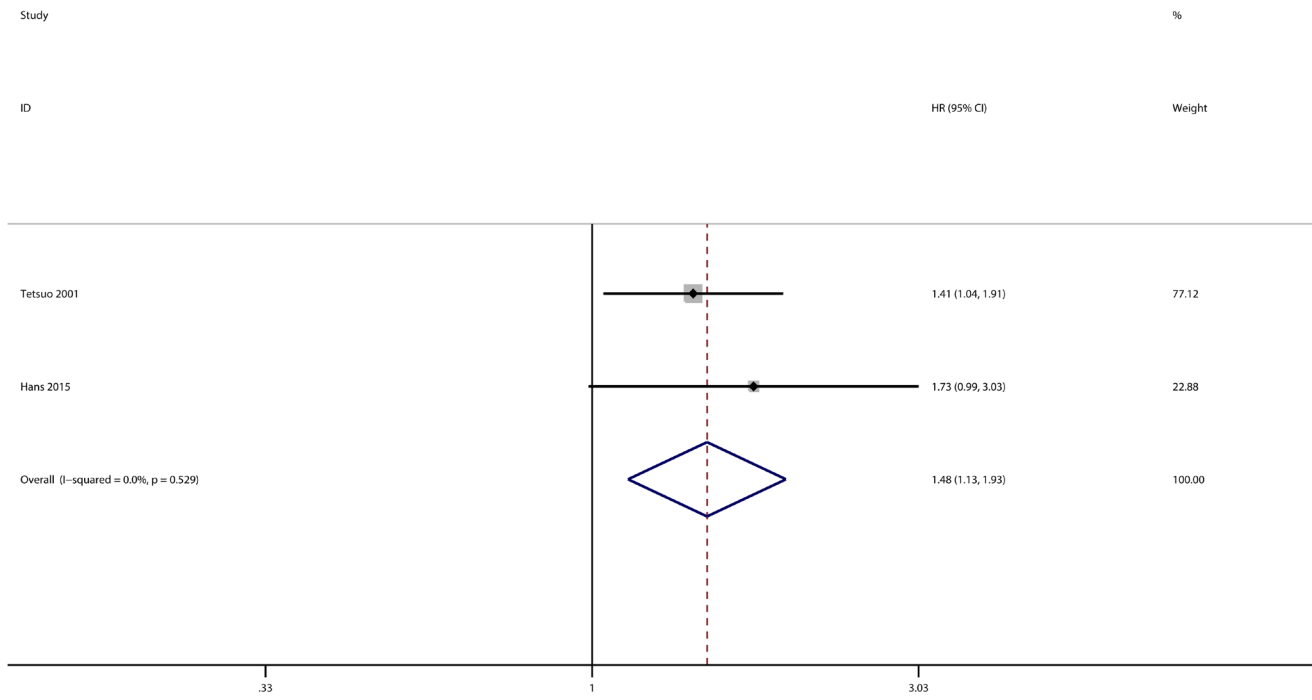

Supplementary Figure 2: Meta-analysis with a random-effect model for the association between GLUT-1 and OS in gastric cancer.

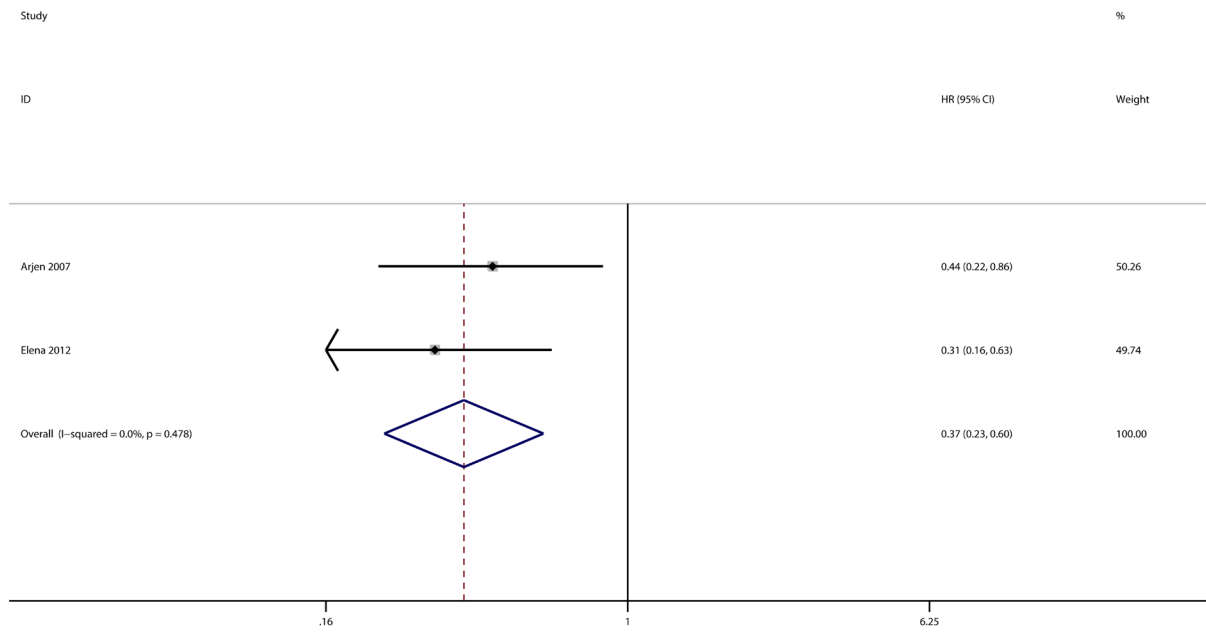

**Supplementary Figure 3: Meta-analysis with a random-effect model for the association between GLUT-1 and OS in colorectal cancer.**
